# Supplementary material for: The combination of intercalation and conversion reactions to improve the volumetric capacity of the cathode in Li–S batteries
Source: Royal Society of Chemistry journal article supplement (doi:10.1039/c8ta11375k), 2019-01-01
Supplement: c8ta11375k1.pdf [file c8ta11375k1.pdf]

## Supporting Information

# The Union of Intercalation and Conversion Reactions to Improve the Volumetric Capacity of Cathode in Li-S Batteries

Ling Zhou<sup>a</sup>, Lin Yao<sup>a</sup>, Shixiong Li<sup>a</sup>, Jiantao Zai<sup>\* a</sup>, Shutang Li<sup>a</sup>, Qingquan He<sup>b</sup>, Kai He<sup>a</sup>,  
Xiaomin Li<sup>a</sup>, Donghai Wang<sup>c</sup>, and Xuefeng Qian<sup>\*a</sup>

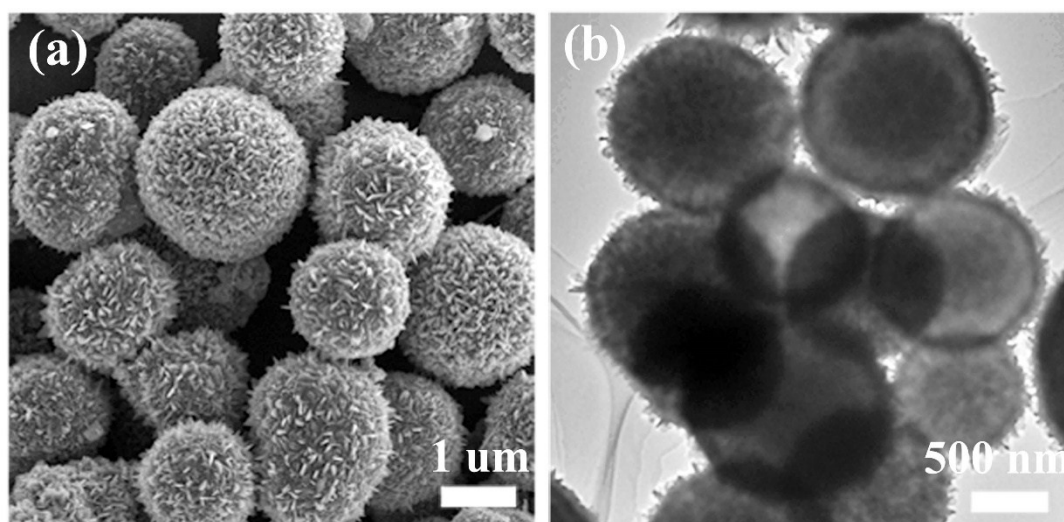

**Figure S1.** (a) SEM and (b) TEM images of VO<sub>2</sub> HSs.

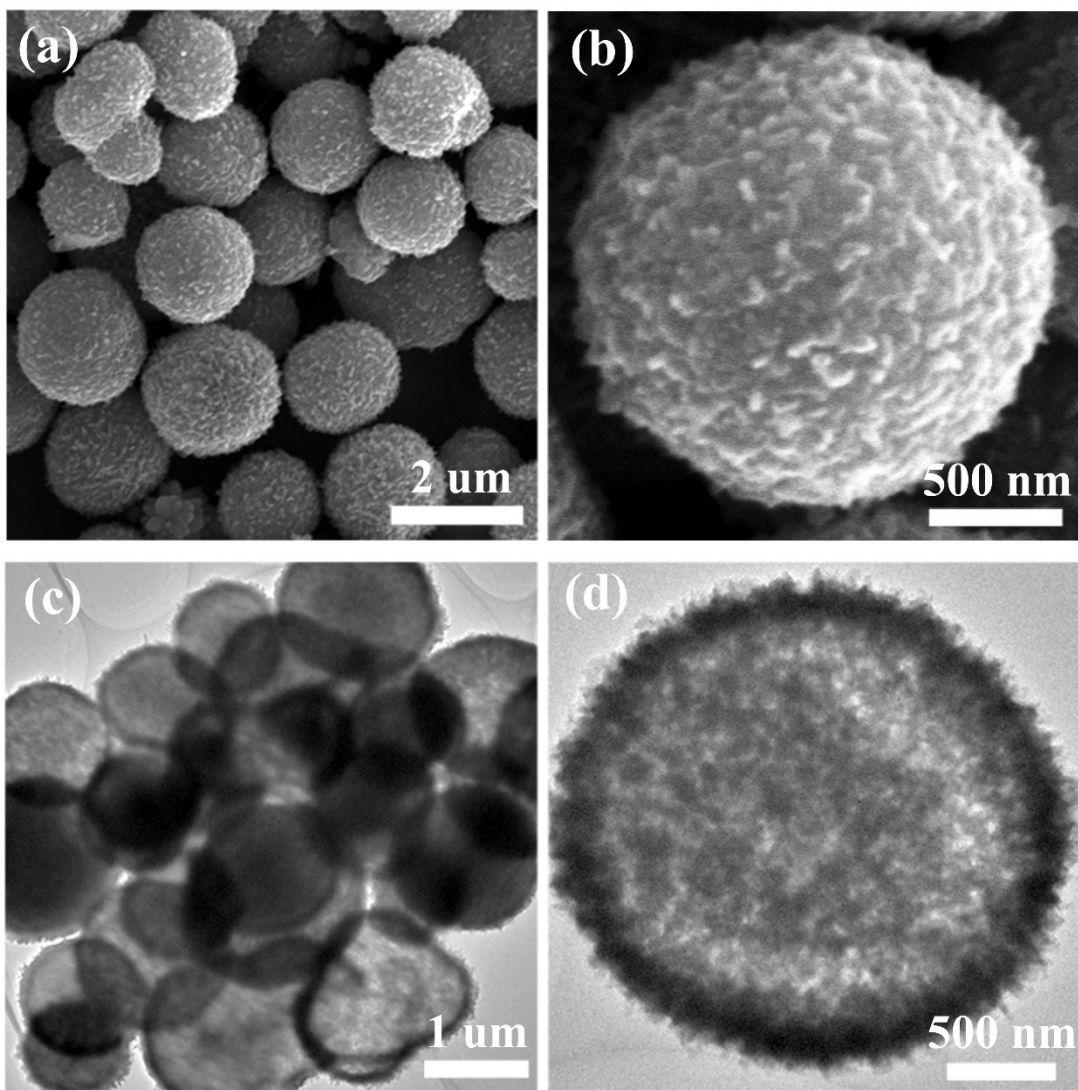

**Figure S2.** (a, b) SEM images and (c, d) TEM images of  $V_2O_5$  HSs.

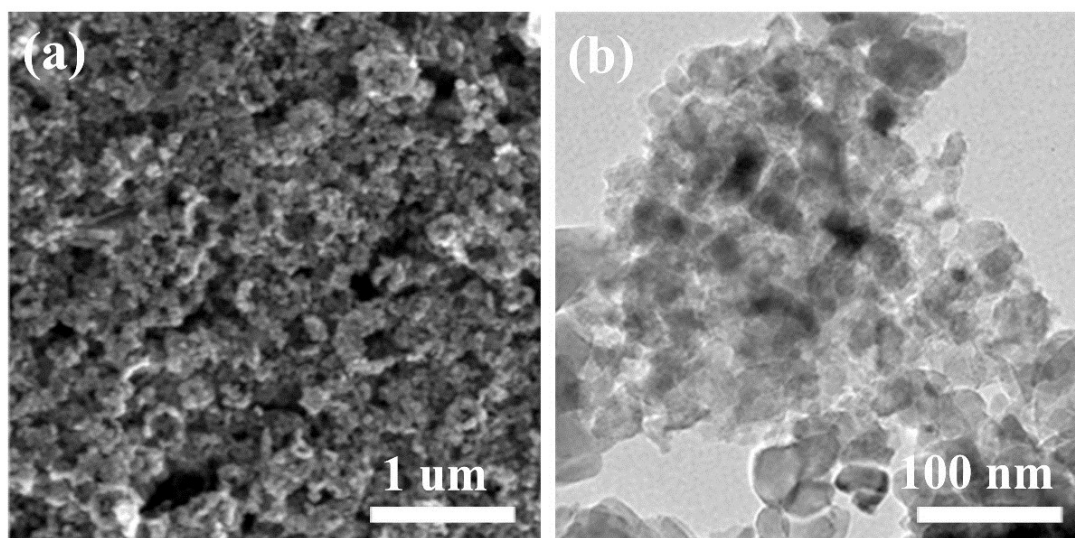

**Figure S3.** (a) SEM image and (b) TEM image of VO<sub>2</sub> particles.

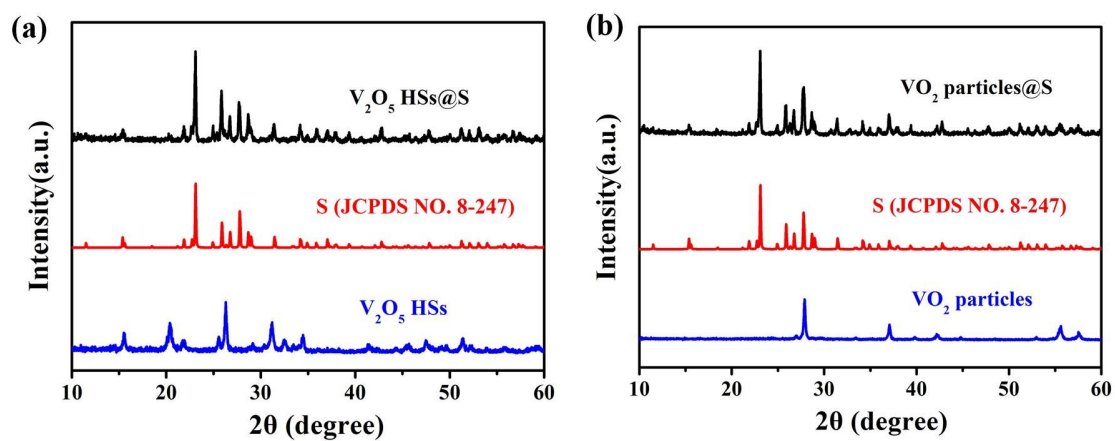

**Figure S4.** XRD patterns of (a) V<sub>2</sub>O<sub>5</sub> HSs@S and (b) VO<sub>2</sub> particles@S.

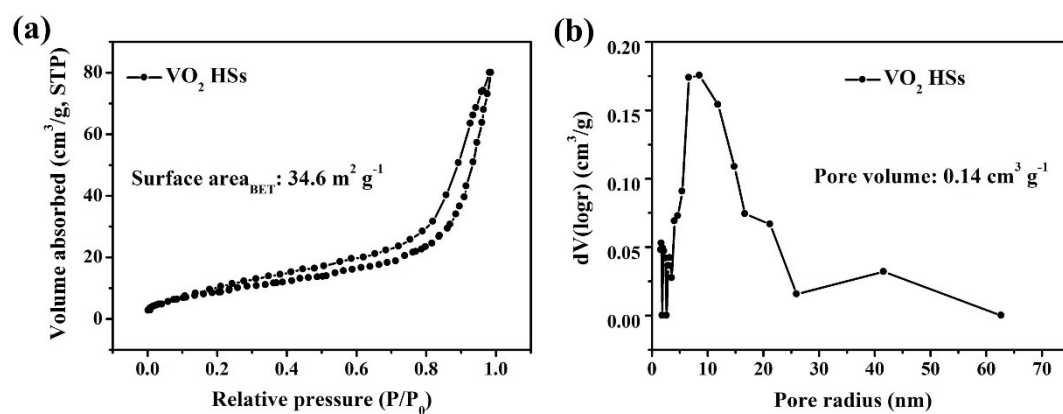

**Figure S5.** (a) N<sub>2</sub> adsorption/desorption isotherm, and (b) pore size distribution of VO<sub>2</sub> HSs.

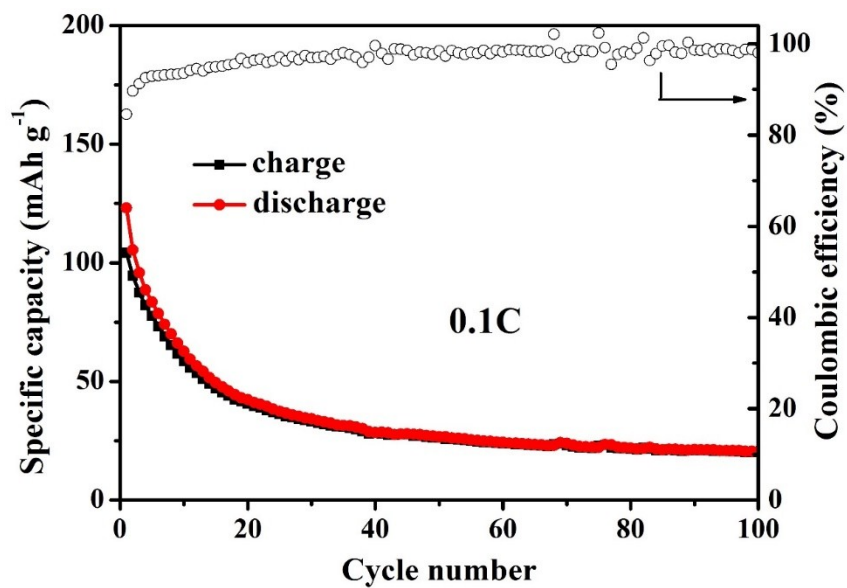

**Figure S6.** Cycling performance of a bare VO<sub>2</sub> HSs cathode at a current density of 0.1 C for 100 cycles.

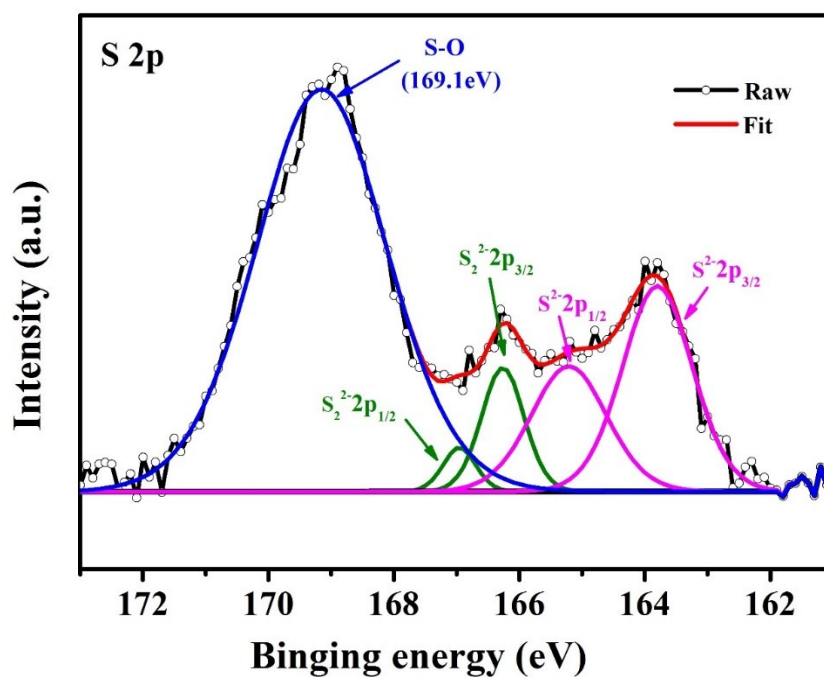

**Figure S7.** XPS spectra for S 2p of VO<sub>2</sub> HSs after remove sulfur from VO<sub>2</sub> HSs@S.
